# Supplementary material for: Novel temporin L antimicrobial peptides: promoting self-assembling by lipidic tags to tackle superbugs
Source: PubMed Central journal article supplement (PMC7534258; doi:10.1080/14756366.2020.1819258), 2020-09-22
Supplement: IENZ_A_1819258_SM9825.pdf [file IENZ_A_1819258_SM9825.pdf]

## *Supporting information*

### **Novel Temporin L antimicrobial peptides: promoting self-assembling by lipidic tags to tackle superbugs**

Rosa Bellavita,<sup>a</sup> Annarita Falanga,<sup>b</sup> Elisabetta Buommino,<sup>a</sup> Francesco Merlino,<sup>a</sup> Bruno Casciaro,<sup>c</sup> Floriana Cappiello,<sup>d</sup> Maria Luisa Mangoni,<sup>d</sup> Ettore Novellino,<sup>a</sup> Maria Rosaria Catania,<sup>e</sup> Rossella Paolillo,<sup>e</sup> Paolo Grieco<sup>a\*</sup> and Stefania Galdiero<sup>a\*</sup>

<sup>a</sup>Department of Pharmacy, University of Naples “Federico II”, Naples 80131 (Italy); <sup>b</sup>Department of Agricultural Sciences, University of Naples "Federico II", Via Università 100, 80055 Portici, Italy; <sup>c</sup>Center for Life Nano Science@Sapienza, Italian Institute of Technology, Rome, Italy; <sup>d</sup>Department of Biochemical Sciences, Laboratory affiliated to Pasteur Institute Italia-Fondazione Cenci Bolognetti, Sapienza University of Rome, Rome 00185 (Italy); <sup>e</sup>Department of Molecular Medicine and Medical Biotechnologies, University of Naples “Federico II”, 80131 Naples, Italy.

\*Corresponding authors: stefania.galdiero@unina.it; paolo.grieco@unina.it

#### **Table of contents**

- |                                                                                 |       |
|---------------------------------------------------------------------------------|-------|
| 1. Synthetic path for the achievement of peptides <b>2A-5A, 2B-5B, C, D, E</b>  | S2-3  |
| 2. Analytical data of peptides <b>2A-5A, 2B-5B, C, D, E</b> (Table S1)          | S4    |
| 3. HPLC chromatograms of peptides <b>2A-5A, 2B-5B, C, D, E</b> (Figures S3-13). | S4-S9 |

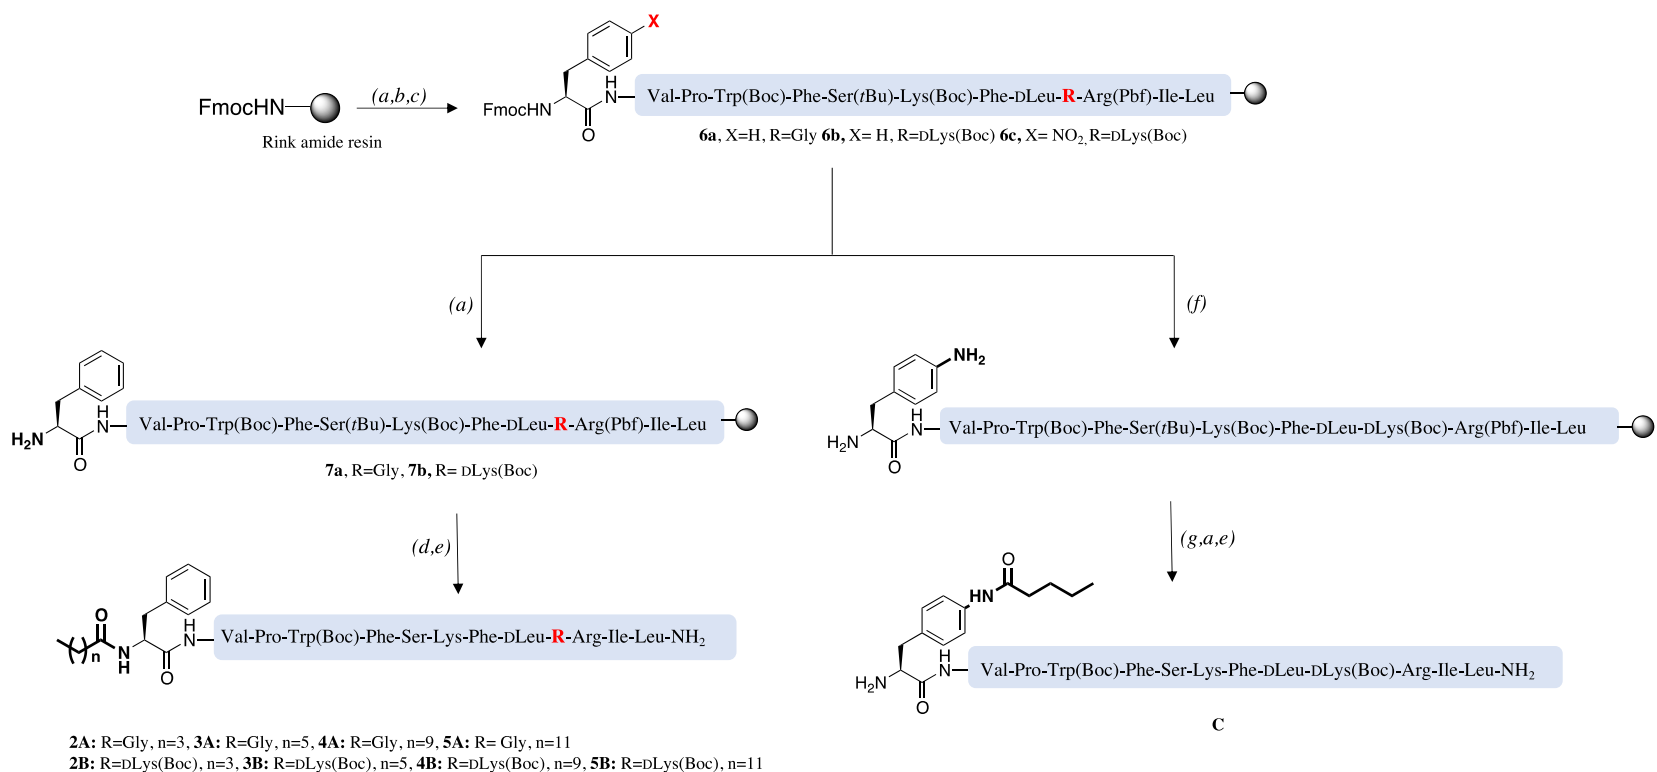

**Scheme S1.** (a) 20% piperidine in DMF, 0.5 + 1 min, ultrasonic irradiation; (b) Fmoc-Leu-OH (3 equiv), HBTU (3 equiv), HOBT (3equiv), DIEA (6 equiv), 1:1 DMF/DCM, 5 min, ultrasonic irradiation; (c) US-SPPS; (d) Fatty acid (3 equiv), HBTU (3 equiv), HOBT (3equiv), DIEA (6equiv), 1:1 DMF/DCM, 15 min, ultrasonic irradiation; (e) TFA/TIS/H<sub>2</sub>O (95:2.5:2.5 v/v/v), 3h, rt; (f) SnCl<sub>2</sub> 1M in DMF, 12h, rt; (g) Valeric acid (3 equiv), HBTU (3 equiv), HOBT (3 equiv), DIEA (6 equiv), 2h, rt.

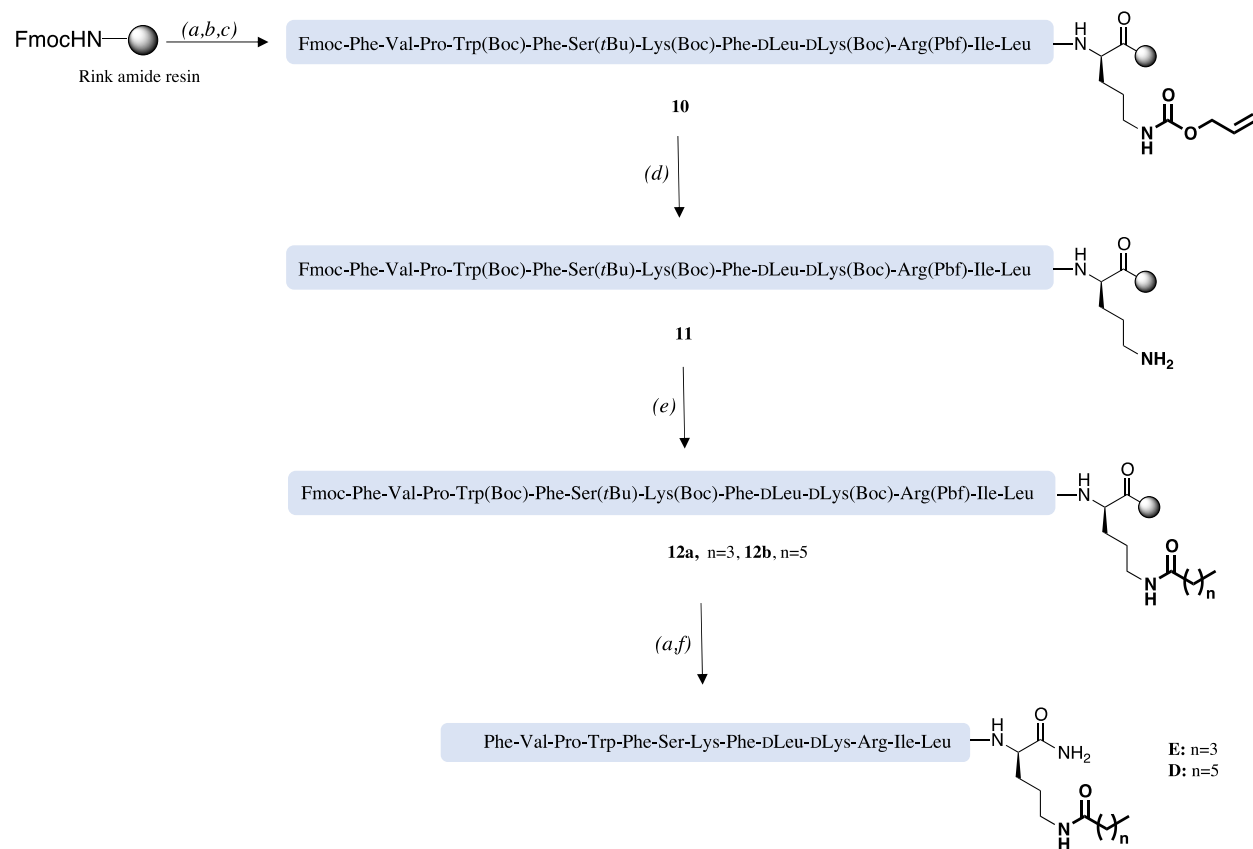

**Scheme 2.** (a) 20% piperidine in DMF, 0.5 + 1 min, ultrasonic irradiation; (b) Fmoc-Orn(Alloc)-OH (3 equiv), HBTU (3equiv), HOBt (3equiv), DIEA (6equiv), 1:1 DMF/DCM, 5 min, ultrasonic irradiation; (c) US-SPPS; (d) Pd(PPh<sub>3</sub>)<sub>4</sub> (0.15 equiv), dimethylbarbituric acid (3equiv), DCM/DMF (3:2 v/v), 1h (x2), rt; (e) Fatty acid (3 equiv), HBTU (3 equiv), HOBt (3 equiv), DIEA (6 equiv), 1:1 DMF/DCM, 15 min, ultrasonic irradiation; (f) TFA/TIS/H<sub>2</sub>O (95:2.5:2.5 v/v/v), 3h, rt.

| HRMS m/z |           |                                  |
|----------|-----------|----------------------------------|
| Compound | calcd.    | obsd.                            |
| 2A       | 1694.0027 | [M+H/2] <sup>+</sup> = 847.5036  |
| 3A       | 1722.0340 | [M+H/2] <sup>+</sup> =861.5185   |
| 4A       | 1778.0966 | [M+H/2] <sup>+</sup> = 889.551   |
| 5A       | 1806.1279 | [M+H/2] <sup>+</sup> = 903.5670  |
| 2B       | 1765.0762 | [M+2H/2] <sup>+</sup> =883.0450  |
| 3B       | 1793.1075 | [M+2H/2] <sup>+</sup> = 897.0603 |
| 4B       | 1849.1701 | [M+H/2] <sup>+</sup> =925.0869   |
| 5B       | 1877.2014 | [M+2H/2] <sup>+</sup> = 939.1046 |
| C        | 1780.0871 | [M+H/2] <sup>+</sup> = 890.5464  |
| D        | 1879.1555 | [M+2H/2] <sup>+</sup> =940.0730  |
| E        | 1907.1868 | [M+2H/2] <sup>+</sup> = 954.0976 |

**Table S1.** HRMS calculated and observed for peptides **2A-5A**, **2B-5B**, **C**, **D**, **E**.

### HPLC chromatograms of peptides **2A-5A**, **2B-5B**, **C**, **D**, **E**

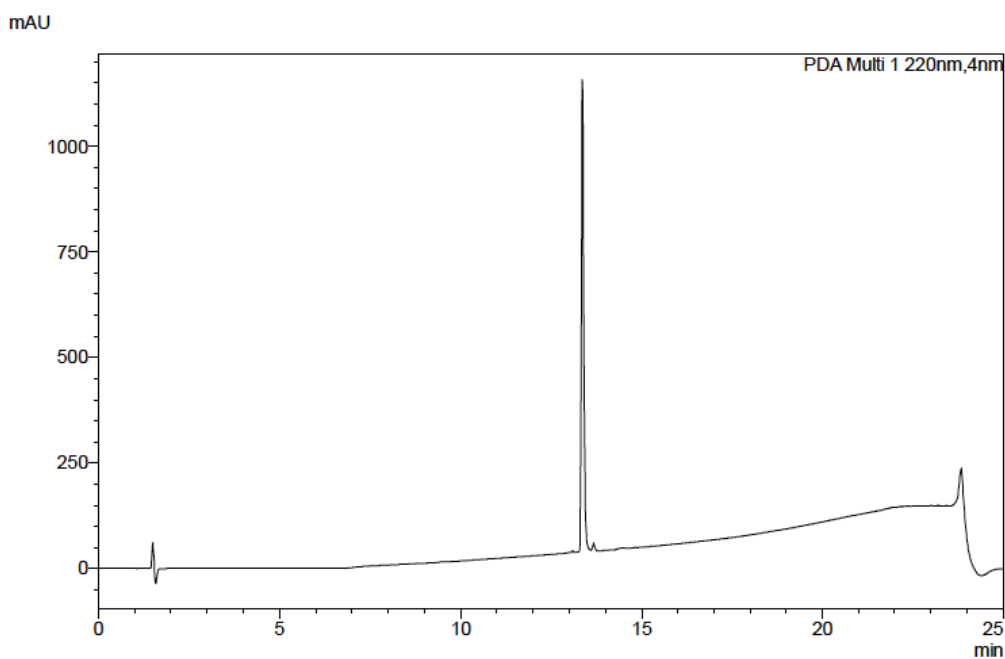

**Figure S3.** Chromatogram of **2A** obtained by an analytical HPLC (Shimadzu UFLC SPD-M20A/DGU-20A3R/LC-20AD) equipped with a Phenomenex Kinetex C18 column (150 mm × 4.6 mm, 5 μm, 100 Å), and monitored by UV detection at 220 nm.  $t_R$ : 13.4 min [linear gradient 10-90% MeCN (0.1% TFA) in H<sub>2</sub>O (0.1% TFA) over 20 min, flow rate of 1 mL/min].

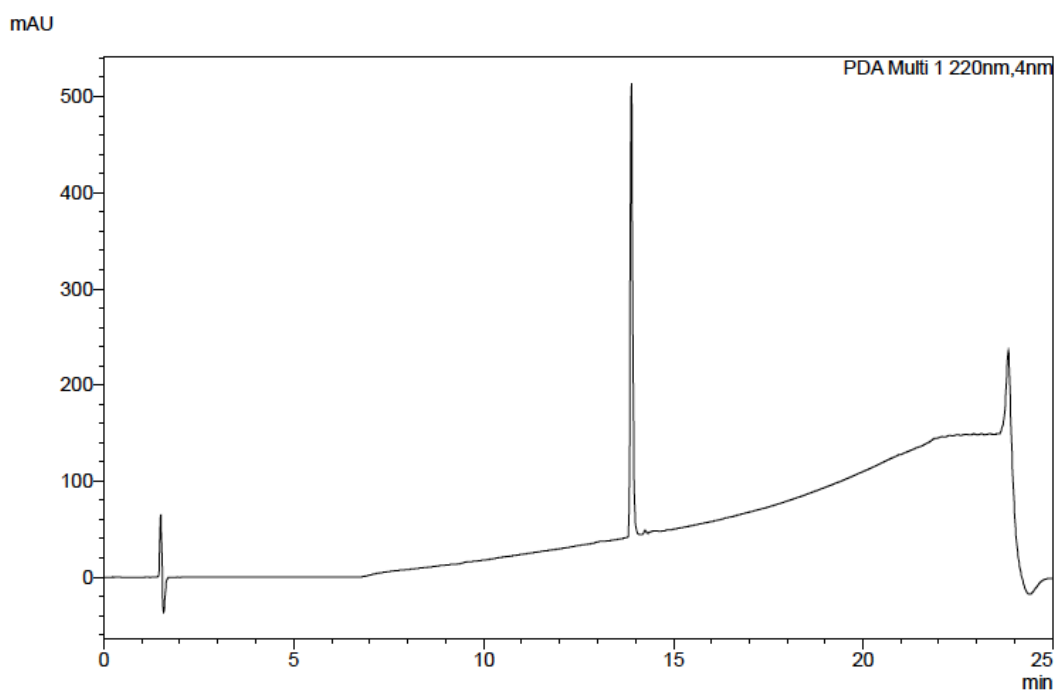

**Figure S4.** Chromatogram of **3A** obtained by an analytical HPLC (Shimadzu UFLC SPD-M20A/DGU-20A3R/LC-20AD) equipped with a Phenomenex Kinetex C18 column (150 mm  $\times$  4.6 mm, 5  $\mu$ m, 100  $\text{\AA}$ ), and monitored by UV detection at 220 nm.  $t_R$ : 13.9 min [linear gradient 10-90% MeCN (0.1% TFA) in H<sub>2</sub>O (0.1% TFA) over 20 min, flow rate of 1 mL/min].

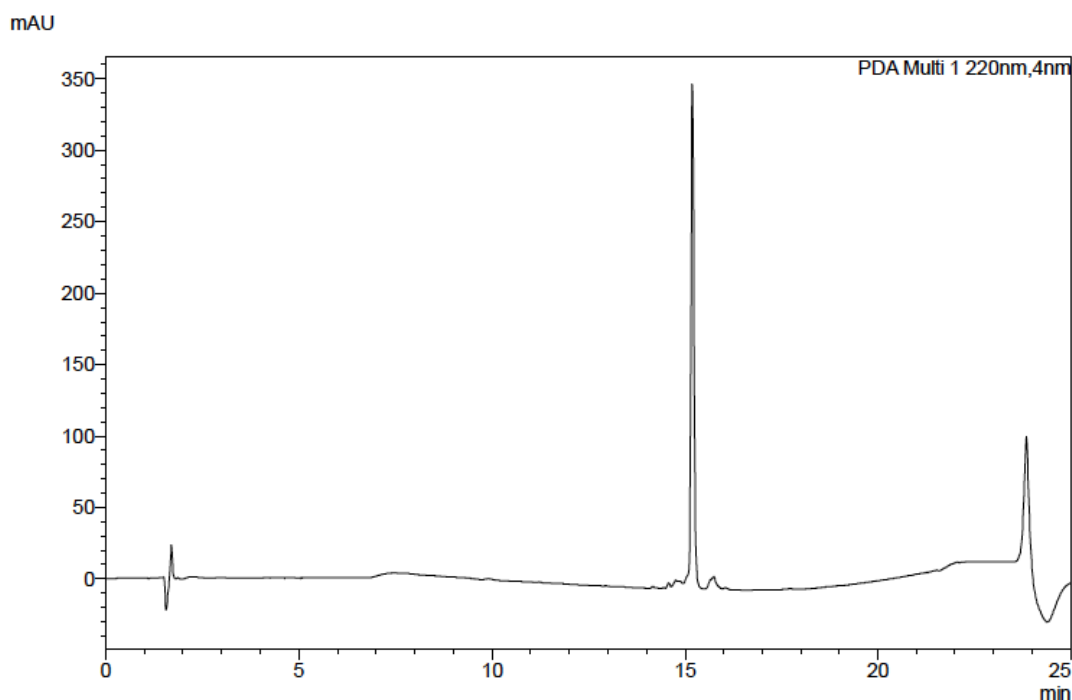

**Figure S5.** Chromatogram of **4A** obtained by an analytical HPLC (Shimadzu UFLC SPD-M20A/DGU-20A3R/LC-20AD) equipped with a Phenomenex Kinetex C18 column (150 mm  $\times$  4.6 mm, 5  $\mu$ m, 100  $\text{\AA}$ ), and monitored by UV detection at 220 nm.  $t_R$ : 15.8 min [linear gradient 10-90% MeCN (0.1% TFA) in H<sub>2</sub>O (0.1% TFA) over 20 min, flow rate of 1 mL/min].

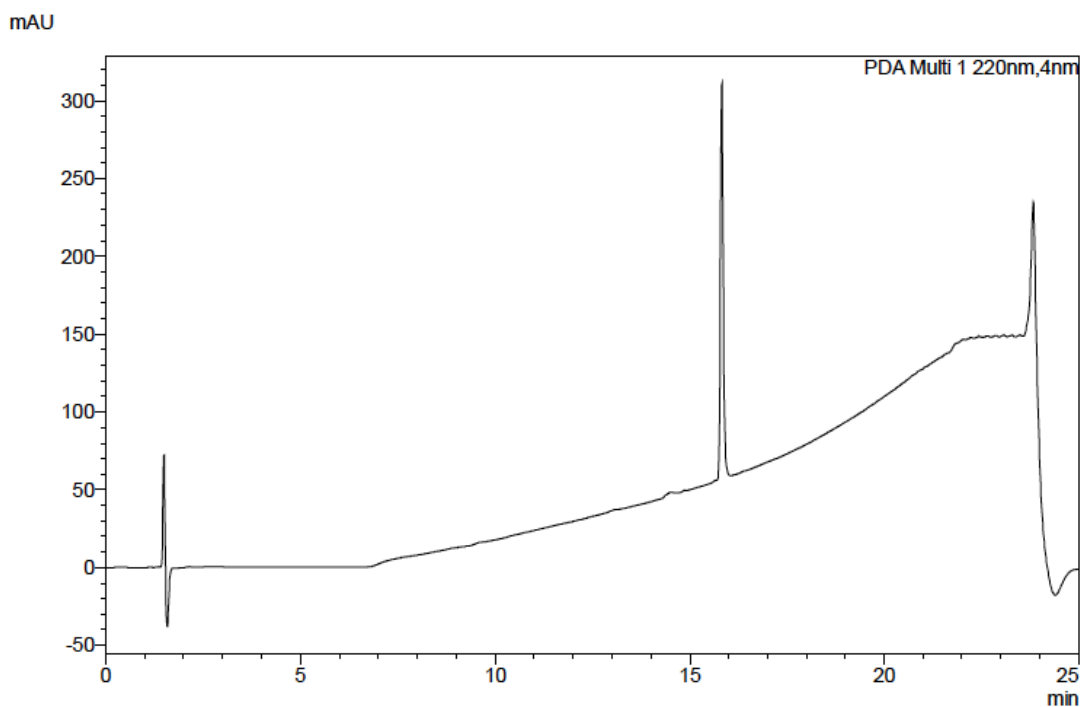

**Figure S6.** Chromatogram of **5A** obtained by an analytical HPLC (Shimadzu UFLC SPD-M20A/DGU-20A3R/LC-20AD) equipped with a Phenomenex Kinetex C18 column (150 mm × 4.6 mm, 5 μm, 100 Å), and monitored by UV detection at 220 nm.  $t_R$ : 15.2 min [linear gradient 10-90% MeCN (0.1% TFA) in H<sub>2</sub>O (0.1% TFA) over 20 min, flow rate of 1 mL/min].

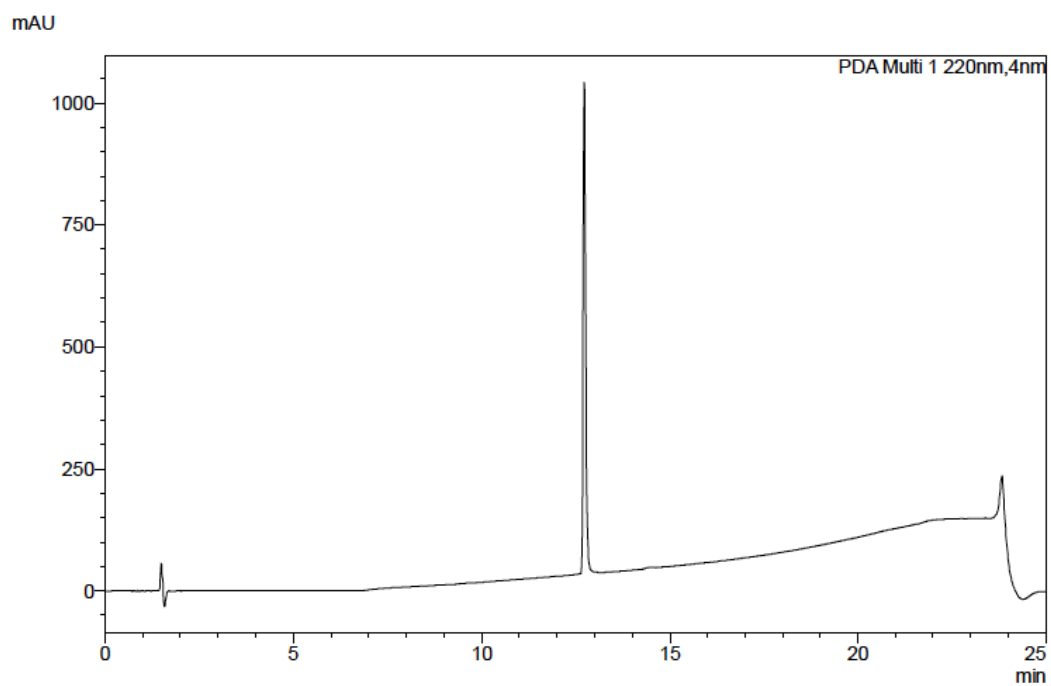

**Figure S7.** Chromatogram of **2B** obtained by an analytical HPLC (Shimadzu UFLC SPD-M20A/DGU-20A3R/LC-20AD) equipped with a Phenomenex Kinetex C18 column (150 mm × 4.6 mm, 5 μm, 100 Å), and monitored by UV detection at 220 nm.  $t_R$ : 12.7 min [linear gradient 10-90% MeCN (0.1% TFA) in H<sub>2</sub>O (0.1% TFA) over 20 min, flow rate of 1 mL/min].

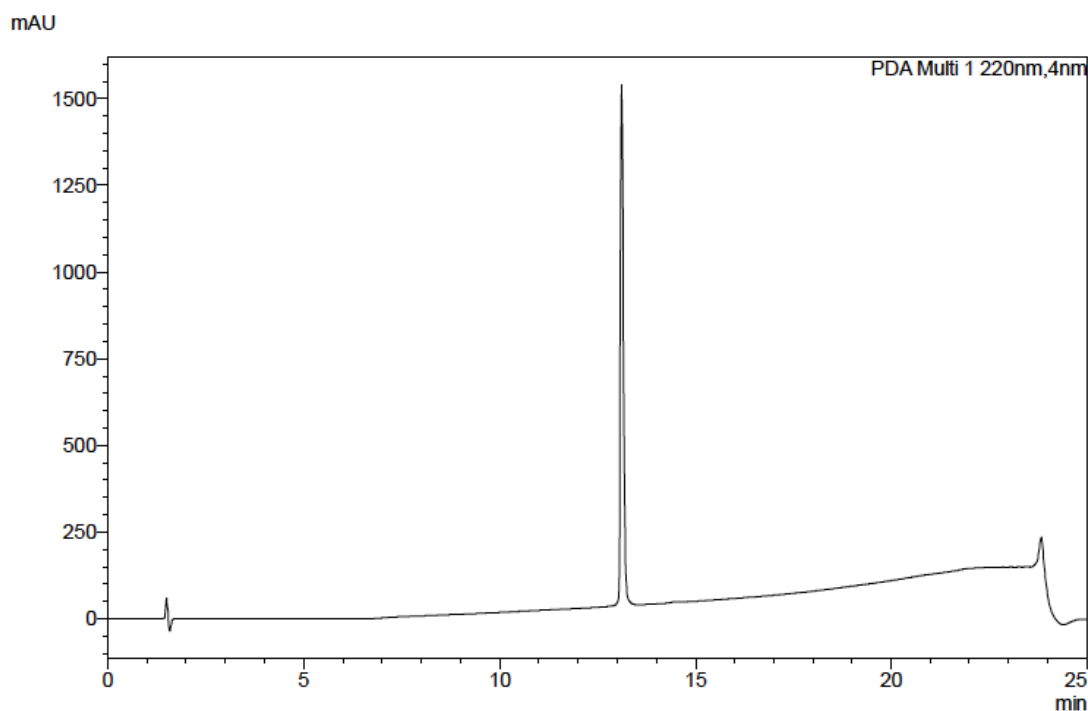

**Figure S8.** Chromatogram of **3B** obtained by an analytical HPLC (Shimadzu UFLC SPD-M20A/DGU-20A3R/LC-20AD) equipped with a Phenomenex Kinetex C18 column (150 mm × 4.6 mm, 5 μm, 100 Å), and monitored by UV detection at 220 nm.  $t_R$ : 13.1 min [linear gradient 10-90% MeCN (0.1% TFA) in H<sub>2</sub>O (0.1% TFA) over 20 min, flow rate of 1 mL/min].

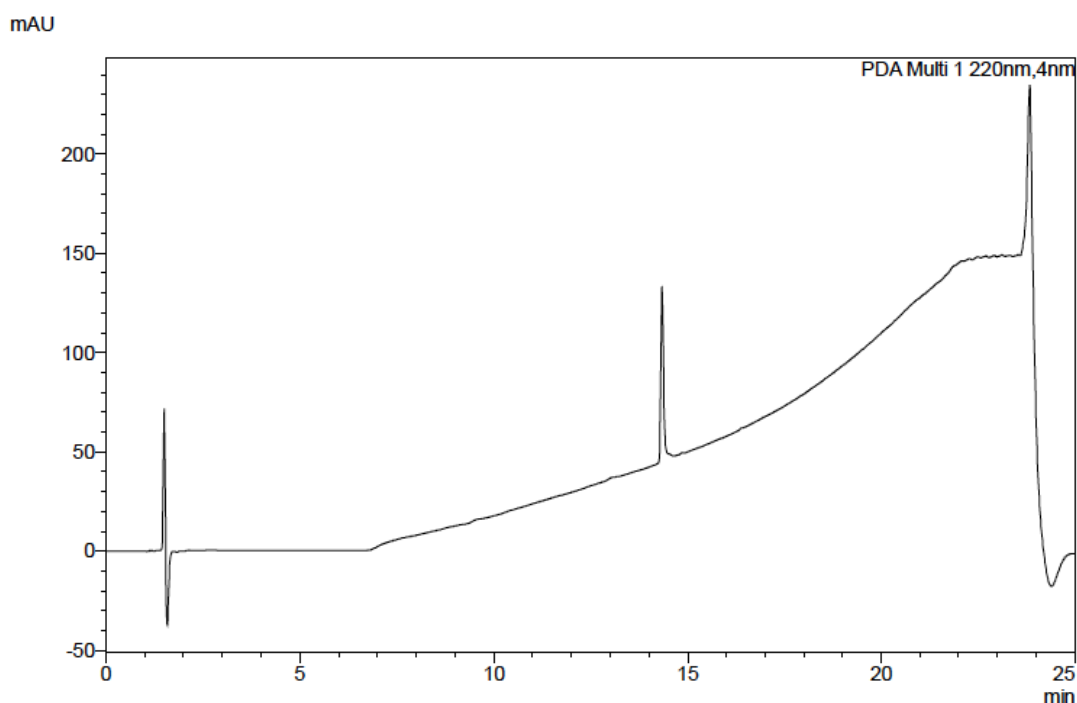

**Figure S9.** Chromatogram of **4B** obtained by an analytical HPLC (Shimadzu UFLC SPD-M20A/DGU-20A3R/LC-20AD) equipped with a Phenomenex Kinetex C18 column (150 mm × 4.6 mm, 5 μm, 100 Å), and monitored by UV detection at 220 nm.  $t_R$ : 14.9 min [linear gradient 10-90% MeCN (0.1% TFA) in H<sub>2</sub>O (0.1% TFA) over 20 min, flow rate of 1 mL/min].

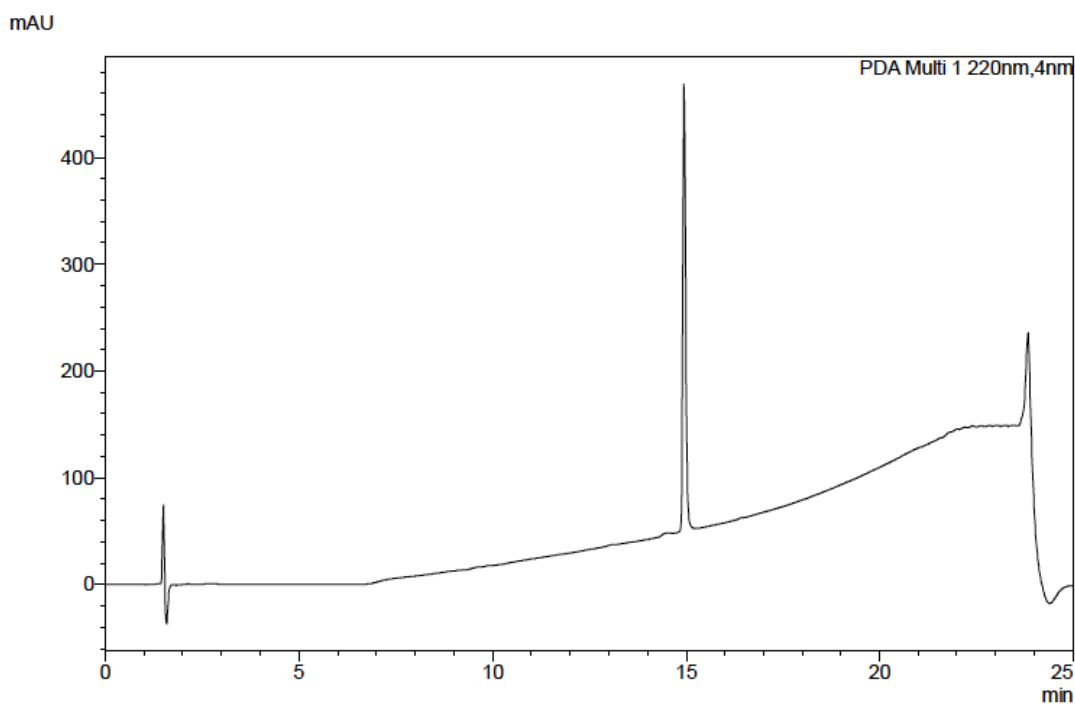

**Figure S10.** Chromatogram of **5B** obtained by an analytical HPLC (Shimadzu UFLC SPD-M20A/DGU-20A3R/LC-20AD) equipped with a Phenomenex Kinetex C18 column (150 mm  $\times$  4.6 mm, 5  $\mu$ m, 100  $\text{\AA}$ ), and monitored by UV detection at 220 nm.  $t_R$ : 14.3 min [linear gradient 10-90% MeCN (0.1% TFA) in H<sub>2</sub>O (0.1% TFA) over 20 min, flow rate of 1 mL/min].

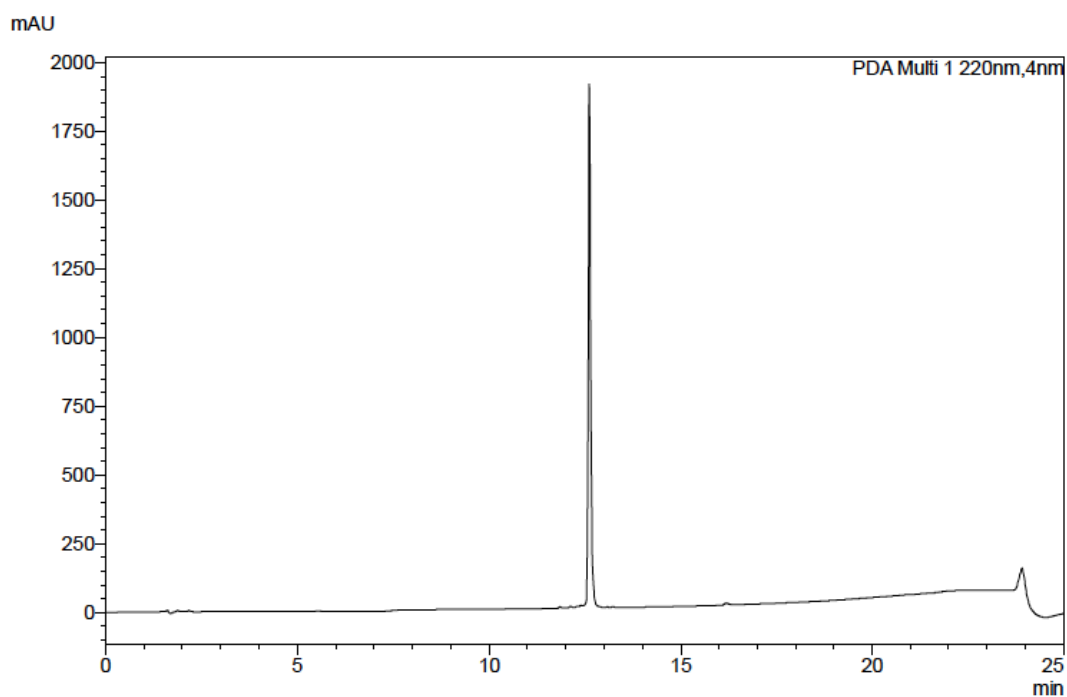

**Figure S11.** Chromatogram of **C** obtained by an analytical HPLC (Shimadzu UFLC SPD-M20A/DGU-20A3R/LC-20AD) equipped with a Phenomenex Kinetex C18 column (150 mm  $\times$  4.6 mm, 5  $\mu$ m, 100  $\text{\AA}$ ), and monitored by UV detection at 220 nm.  $t_R$ : 12.6 min [linear gradient 10-90% MeCN (0.1% TFA) in H<sub>2</sub>O (0.1% TFA) over 20 min, flow rate of 1 mL/min].



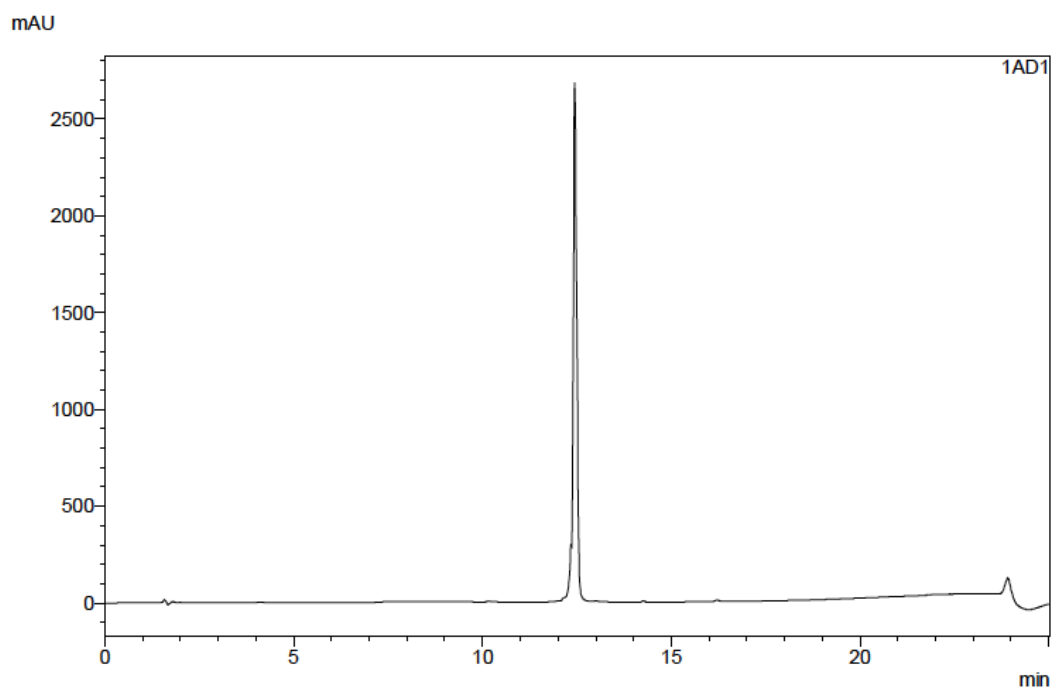

**Figure S12.** Chromatogram of **D** obtained by an analytical HPLC (Shimadzu UFLC SPD-M20A/DGU-20A3R/LC-20AD) equipped with a Phenomenex Kinetex C18 column (150 mm  $\times$  4.6 mm, 5  $\mu$ m, 100  $\text{\AA}$ ), and monitored by UV detection at 220 nm.  $t_R$ : 12.4 min [linear gradient 10-90% MeCN (0.1% TFA) in H<sub>2</sub>O (0.1% TFA) over 20 min, flow rate of 1 mL/min].

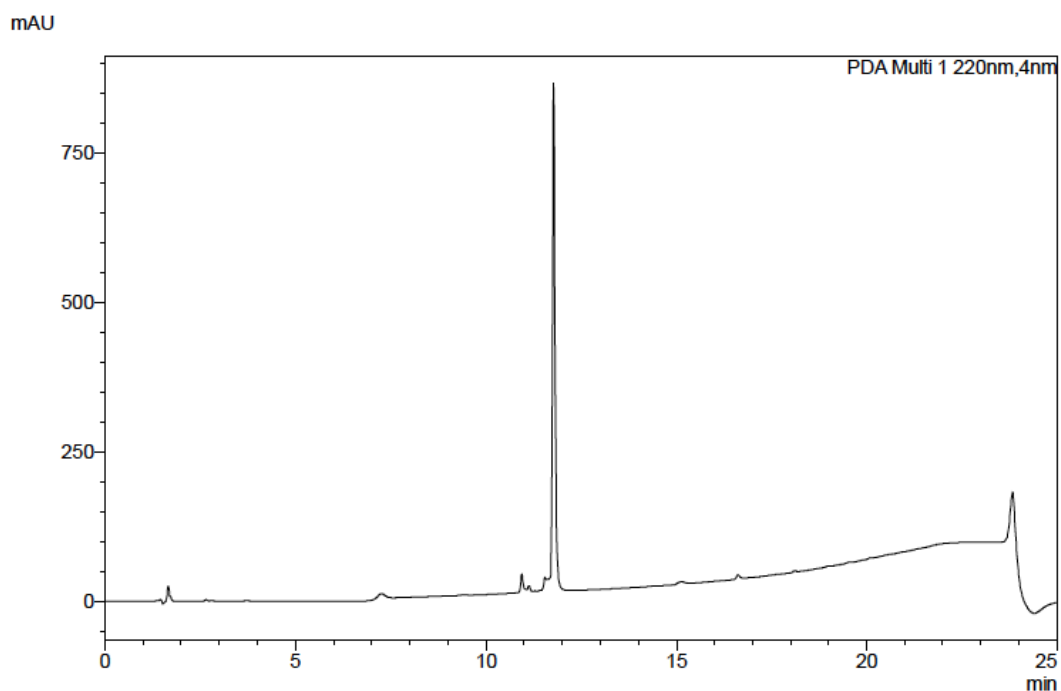

**Figure S13.** Chromatogram of **E** obtained by an analytical HPLC (Shimadzu UFLC SPD-M20A/DGU-20A3R/LC-20AD) equipped with a Phenomenex Kinetex C18 column (150 mm  $\times$  4.6 mm, 5  $\mu$ m, 100  $\text{\AA}$ ), and monitored by UV detection at 220 nm.  $t_R$ : 11.8 min [linear gradient 10-90% MeCN (0.1% TFA) in H<sub>2</sub>O (0.1% TFA) over 20 min, flow rate of 1 mL/min].
